# Supplementary material
Source: ML conference proceedings conference paper supplement (https://openaccess.thecvf.com/content/ICCV_2019/html/Zakharov_DPOD_6D_Pose_ICCV_2019_paper.html)
Supplement: Supplementary file 1 [file Zakharov_DPOD_6D_Pose_ICCV_2019_supplemental.pdf]

Archive with 2 entries (2 files):
- 3375-supp.pdf
- 3375-video.mp4
