# Supplementary material
Source: ML conference proceedings conference paper supplement (https://openaccess.thecvf.com/content/ICCV_2019/html/Zakharov_DPOD_6D_Pose_ICCV_2019_paper.html)
Supplement: Supplementary file 1 [file Zakharov_DPOD_6D_Pose_ICCV_2019_supplemental.pdf › 3375-supp.pdf]

## DPOD: 6D Pose Object Detector and Refiner (Supplementary Material)

## 1. Implementation Details

The architecture of our detector is visualized in Figure 1. The refinement network utilizes the same backbone architecture. It is a standard ResNet-like (ResNet18 in PyTorch) model with a reduced number of layers and pooling operations in comparison to the original ResNet first presented in [1]. Upsampling is implemented as bilinear interpolation rather than deconvolution in order to decrease the number of parameters and the required amount of computations. Each upsampling is followed by the concatenation of the output feature map with the feature map from the previous level, and one convolutional layer. When the detector is trained on synthetic data, the first five layers are frozen in order to prevent overfitting to peculiarities of the rendered data. The architecture of the refinement network follows the same architectural idea, except for the absence of upsampling and presence of fully-connected layers at the end. Again, the first five layers are used in siamese-like fashion for extracting features from image crops and renderings.

## 2. RANSAC Iterations

The number of RANSAC iterations crucially influences the quality of predicted poses. We ended up using 150 iterations as it yielded the best trade off between quality and runtime. The larger amount of iterations generally did not improve the results significantly, but resulted in longer execution times (see Table 1). Additionally, the ADD scores after one iteration of the proposed refinement are provided. They show that even 25 iterations of RANSAC are enough to beat the state-of-the-art results if the refinement is used. More iterations of RANSAC do not result in the considerable increase of pose quality.

Table 1: **RANSAC iterations test:** The effect of the number of RANSAC iterations on the overall ADD score.

| <b>RANSAC #</b>    | <b>5</b> | <b>25</b> | <b>50</b> | <b>100</b> | <b>150</b> | <b>200</b> | <b>250</b> | <b>350</b> | <b>500</b> |
|--------------------|----------|-----------|-----------|------------|------------|------------|------------|------------|------------|
| <b>ADD w/o ref</b> | 59.15    | 76.95     | 80.15     | 82.12      | 82.98      | 83.44      | 83.79      | 84.33      | 84.66      |
| <b>ADD w/ ref</b>  | 80.45    | 92.59     | 93.88     | 94.79      | 95.15      | 95.31      | 95.39      | 95.38      | 95.39      |
| <b>RANSAC ms</b>   | 2        | 6         | 10        | 17         | 23         | 28         | 33         | 42         | 54         |

### 3. Runtime analysis

In Table 4 we provide the runtimes of the proposed approach for all models of the LineMOD dataset. The total runtime consists of the time needed for PnP and approximately 13 ms for all the auxiliary tasks: the network’s forward pass, post-processing of predicted segmentation, and computation of 2D-3D correspondences. Table 3 provides

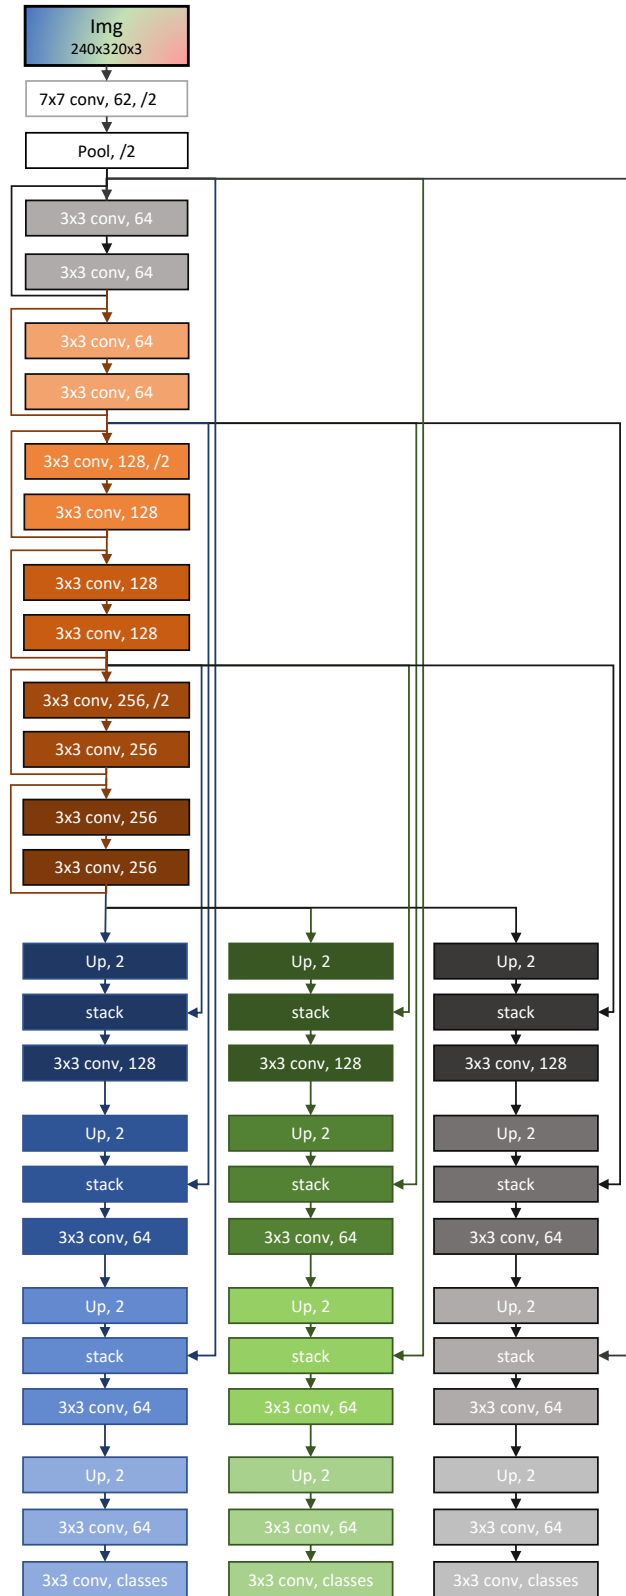

Figure 1: **DPOD’s network architecture:** Encoder-decoder architecture based on ResNet.

Table 2: **Comparison of deep learning-based refinement methods:** Our refinement approach shows the overall best ADD score with respect to the latest state-of-the-art method DeepIM [3].

| Method/Object            | Ape          | Bench.       | Cam          | Can          | Cat          | Dril.       | Duck         | Eggb.        | Gl.          | Hol.         | Iron       | Lamp         | Ph.          | Avg.         |
|--------------------------|--------------|--------------|--------------|--------------|--------------|-------------|--------------|--------------|--------------|--------------|------------|--------------|--------------|--------------|
| PoseCNN [7] + DeepIM [3] | 77.0         | 97.5         | 93.5         | 96.5         | 82.1         | 95.0        | 77.7         | 97.1         | 99.4         | 52.8         | 98.3       | 97.5         | 87.7         | 88.6         |
| Ours + DeepIM [3]        | 78.70        | 98.43        | <b>97.75</b> | 97.57        | 85.16        | 91.55       | 80.24        | 99.68        | <b>99.48</b> | 75.66        | 99.74      | <b>98.20</b> | 91.38        | 91.81        |
| Ours + Our ref.          | <b>87.73</b> | <b>98.45</b> | 96.07        | <b>99.71</b> | <b>94.71</b> | <b>98.8</b> | <b>86.29</b> | <b>99.91</b> | 96.82        | <b>86.87</b> | <b>100</b> | 96.84        | <b>94.69</b> | <b>95.15</b> |

Table 3: **Runtime comparison:** Time-efficiency of our approach with respect to the other state-of-the-art approaches.

| Method     | Frames per second | Refinement    |
|------------|-------------------|---------------|
| AAE [5]    | 4                 | 200 ms/object |
| SSD6D [2]  | 10                | 24 ms/object  |
| PVNet [4]  | 25                | -             |
| Ours       | 33                | 5 ms/object   |
| YOLO6D [6] | 50                | -             |

comparison of the runtime of our detector with all the main competitors mentioned in the paper. All the experiments were conducted on an Intel Core i7-6900K CPU 3.20GHz with NVIDIA TITAN X (Pascal) GPU.

#### 4. Refinement

DeepIM [3] presents an iterative refinement routine that takes an initial pose estimate from any external detector and iteratively improves it. An additional per-model evaluation is provided (see Table 2) to have a fair comparison of DeepIM with our pose refinement. It compares the following ADD scores: 1) ADD reported in the original DeepIM paper [3], which used PoseCNN [7] to predict initial poses,

Table 4: **Runtime analysis:** Runtime of the proposed approach for all models of the LineMOD dataset.

| Model       | PnP + RANSAC (ms) | Total (ms) | FPS |
|-------------|-------------------|------------|-----|
| Ape         | 7                 | 20         | 50  |
| Benchvise   | 40                | 51         | 20  |
| Cam         | 35                | 49         | 20  |
| Can         | 30                | 44         | 23  |
| Cat         | 20                | 33         | 30  |
| Driller     | 26                | 40         | 25  |
| Duck        | 4                 | 16         | 63  |
| Eggbox      | 9                 | 23         | 43  |
| Glue        | 5                 | 17         | 59  |
| Holepuncher | 20                | 31         | 32  |
| Iron        | 34                | 48         | 21  |
| Lamp        | 40                | 54         | 19  |
| Phone       | 31                | 45         | 22  |
| Average     | 23                | 36         | 33  |

2) ADD if DeepIM is applied to poses predicted by our detector, 3) ADD if poses predicted by the proposed detector are refined with the proposed refinement. It is important to mention that two iterations of DeepIM were made, as was suggested in the paper. The proposed refinement was run only for one iteration. The table clearly shows that better initial pose hypotheses allow for better results after refinement. It is also clear that our refinement clearly outperforms DeepIM on most of the objects, while performing only insignificantly worse on others.

#### 5. Correspondence Quality

In this section, we demonstrate the quality of the output correspondences. Namely, each classified correspondence point is mapped to 3D and compared to the ground truth 3D point. The ground truth 3D points are obtained in exactly the same way as predicted points, i.e., by matching a UV map rendered in the ground truth pose to model’s vertices.

The results per object are shown in Table 5. The table reports the quality of correspondences separately for real and synthetic data. For each model, mean absolute error, median absolute error, and standard deviation of absolute errors are reported in millimeters. Relatively large mean error is explained by outliers, some of which can be quite significant. Therefore, median is a better measure due to its robustness to outliers. The table shows that the median error is consistent across all the models. Additionally, it demonstrates that the median error for the detector trained

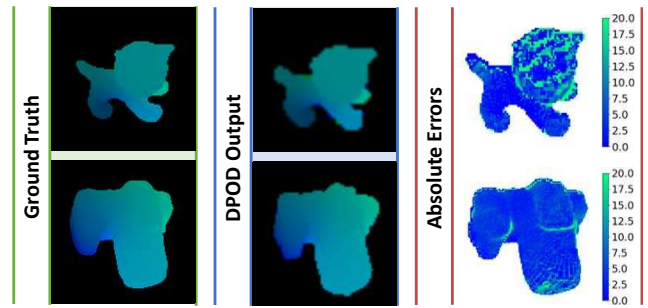

Figure 2: **Qualitative correspondence quality:** Comparison of ground truth (left), predicted (center) UV maps and heat maps (right) of absolute errors.

Table 5: **Quantative correspondence quality:** Correspondence quality for real and synthetic data estimated in terms of mean and median absolute errors, and standard deviation.

|         | Real Data |        |       | Synt Data |        |       |
|---------|-----------|--------|-------|-----------|--------|-------|
| Model   | Mean      | Median | Std   | Mean      | Median | Std   |
| Ape     | 10.05     | 4.58   | 14.60 | 11.46     | 5.74   | 15.26 |
| Benc.   | 10.36     | 4.70   | 19.29 | 15.92     | 6.99   | 25.71 |
| Cam     | 6.57      | 4.58   | 10.11 | 13.31     | 7.23   | 20.23 |
| Can     | 8.19      | 4.03   | 13.46 | 11.97     | 5.10   | 18.72 |
| Cat     | 8.60      | 4.77   | 12.22 | 9.87      | 5.42   | 13.99 |
| Driller | 8.52      | 4.78   | 17.78 | 18.14     | 6.80   | 36.06 |
| Duck    | 5.93      | 3.98   | 8.72  | 7.63      | 4.99   | 10.41 |
| Eggbox  | 6.00      | 4.26   | 10.23 | 42.39     | 9.40   | 48.07 |
| Glue    | 7.82      | 4.26   | 13.73 | 17.12     | 8.11   | 23.19 |
| Holep.  | 8.25      | 4.87   | 13.30 | 11.28     | 6.81   | 16.04 |
| Iron    | 7.18      | 4.51   | 12.31 | 11.06     | 6.89   | 17.34 |
| Lamp    | 11.64     | 4.31   | 24.80 | 18.60     | 8.58   | 30.85 |
| Phone   | 6.09      | 2.84   | 12.94 | 9.52      | 4.38   | 18.31 |

on real data is noticeably lower than for the detector trained on synthetic data. This explains the superior performance of training on real data.

Figure 2 provides a visual comparison of predicted and ground truth UV maps and heat maps, which demonstrate where imprecisions take place. One can see that most imprecisions are concentrated on the outer boundaries of the object and, for objects with more complex geometry, on the edges of their structural elements, i.e. in places where rapid correspondence value changes occur.

## 6. Multiple Instance Detection

Our detector also works when multiple instances of the same object are presented, because we parse through the regions of the output mask when the network forward pass is complete. The only limitation comes into play when several objects of the same class overlap and form a single region. In this case, only one pose will be estimated instead of two.

To overcome this, an additional contour regression head can be added to the correspondence block (see Figure 3). Once regressed, the output contours are simply multiplied with the ID mask forming different regions, which, as a re-

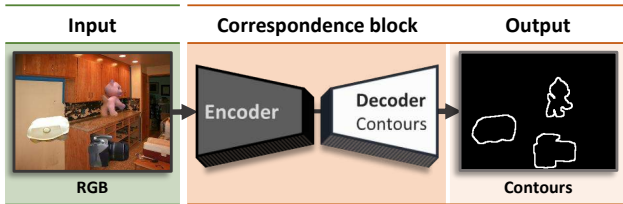

Figure 3: **Contour regression:** Additional contour regression head for multiple instance detection.

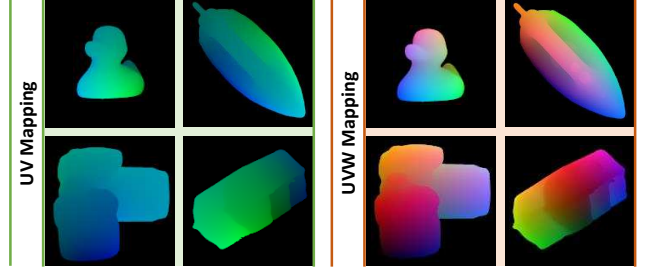

Figure 4: **UVW mapping:** Visual comparison between UV and UVW mappings.

sult, allows to distinguish between different regions of the same class.

## 7. UVW Mapping

While being computationally efficient, the UV mapping has a number of drawbacks. In the majority of cases, a simple spherical projection is sufficient to achieve a satisfactory quality of the mapping. However, certain cases can require a different treatment to minimize the stretching effect where one color can cover several model vertices due to discretization. This is especially a big problem for more complicated geometries, which in some cases might require a selection of another projection type or even a manual UV mapping for reaching the best results.

A straightforward solution to this is the UVW mapping based on normalized 3D coordinates of the model. Instead of 2-channel UV maps, we then have 3-channel UVW maps that are again discretized to the range  $[0, 255]$ . The only algorithmic adjustment that has to be done is an additional W-channel classification head. While decreasing the memory efficiency and increasing a computational complexity of the network (due to a higher-dimensional solution space, i.e.,  $256^3$  instead of  $256^2$  in case of UV mapping), it has an advantage of providing better quality correspondences (especially for objects with complex geometries) and of being fully automatic (see Figure 4 for visual comparison).

Our additional experimental ablations have shown an almost identical performance on the LineMOD and OCCLUSION datasets, but slightly higher execution times and memory requirements. Nevertheless, despite the increased complexity, we believe that this extension would prove itself useful in many real-world applications.

## 8. Additional Qualitative Results

In Figures 5 to 8, we show additional qualitative pose results on LineMOD and OCCLUSION datasets. Our method demonstrates very high quality poses and is robust to occlusions and illumination changes.

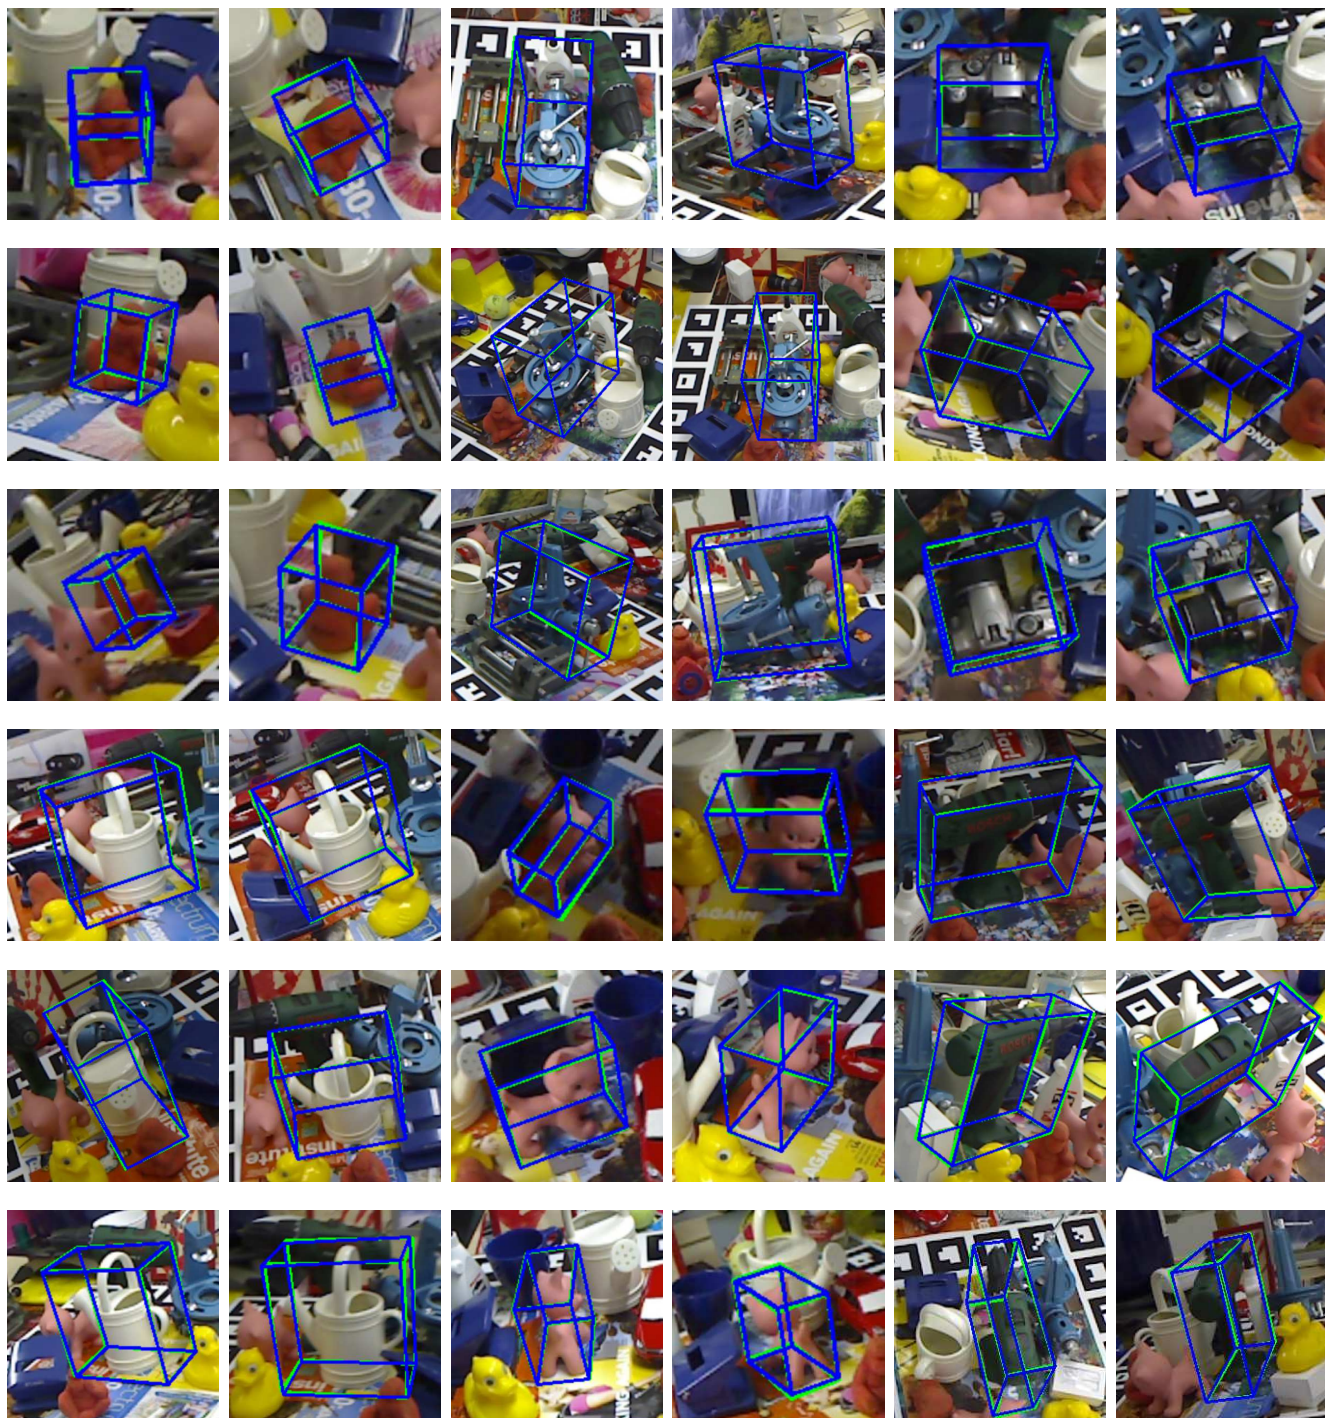

Figure 5: **Example results on the LineMOD dataset:** ape, can (left), benchvise, cat (middle), cam, driller (right). Green bounding boxes correspond to ground truth poses, blue bounding boxes correspond to predicted poses.

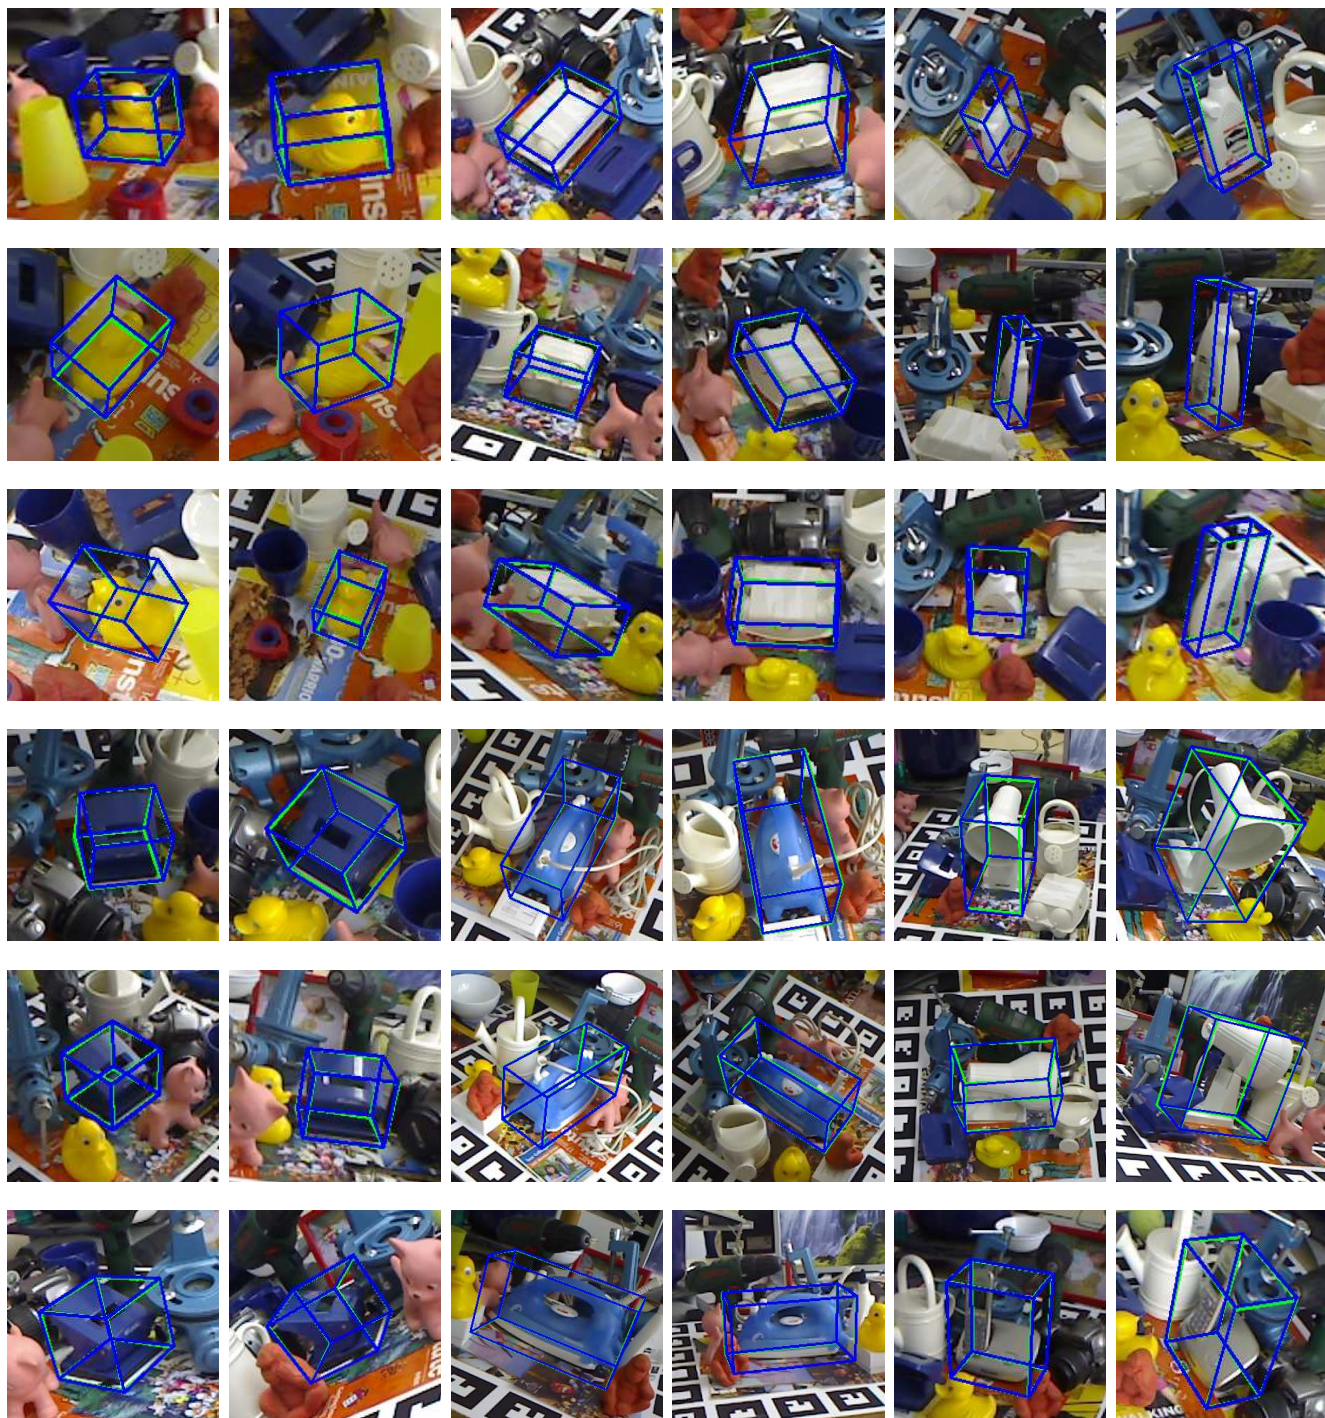

Figure 6: **Example results on the LineMOD dataset:** duck, holepuncher (left), eggbox, iron (middle), glue, lamp, phone (right). Green bounding boxes correspond to ground truth poses, blue bounding boxes correspond to predicted poses.

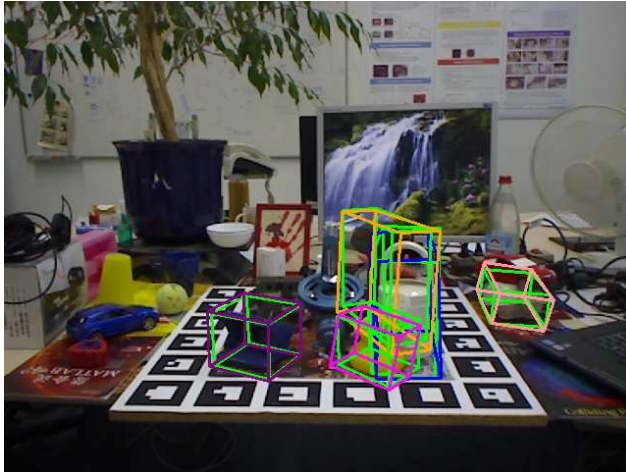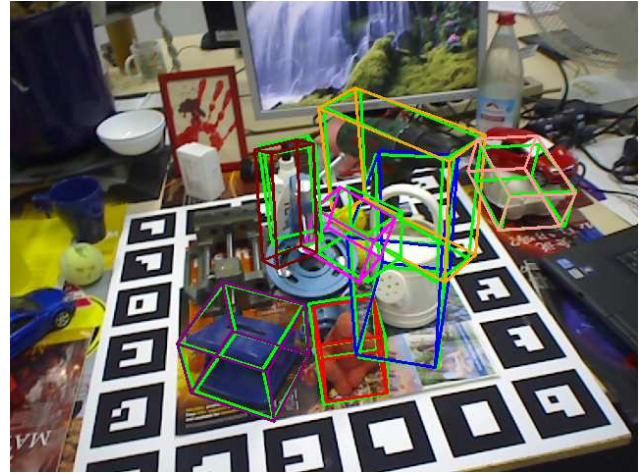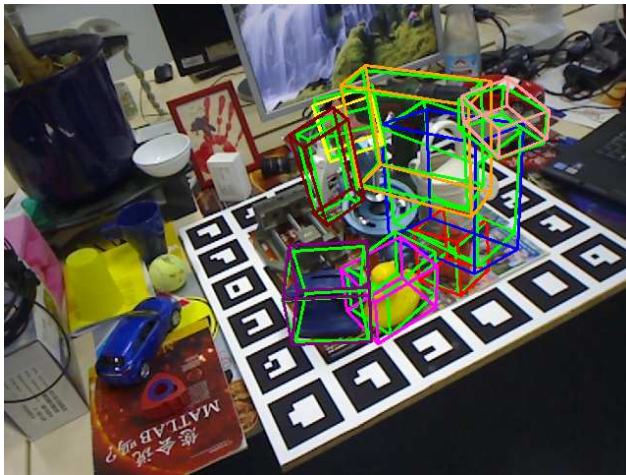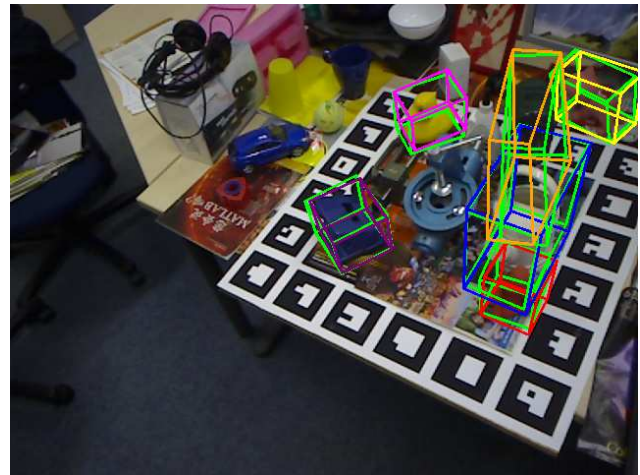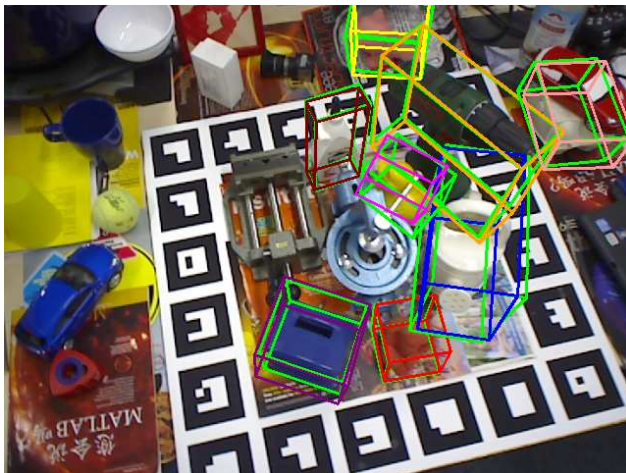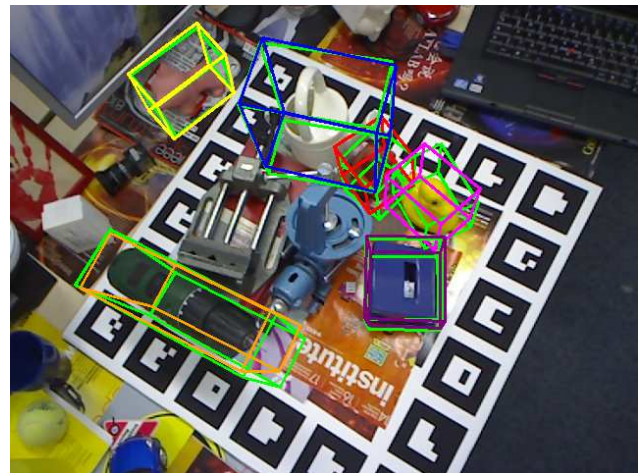

Figure 7: **Example results on the OCCLUSION dataset.** Green bounding boxes correspond to ground truth poses, bounding boxes of other colors correspond to predicted poses.

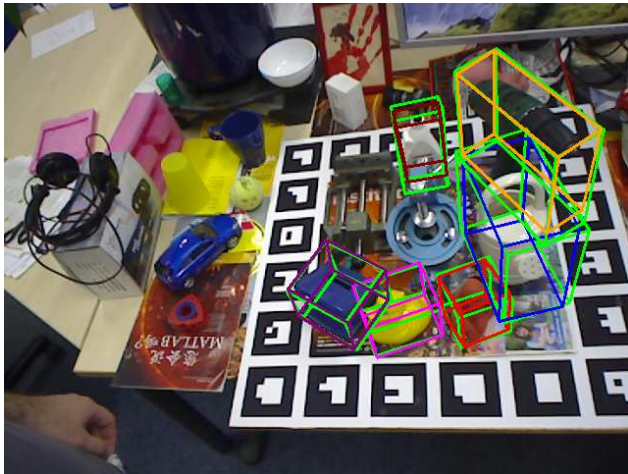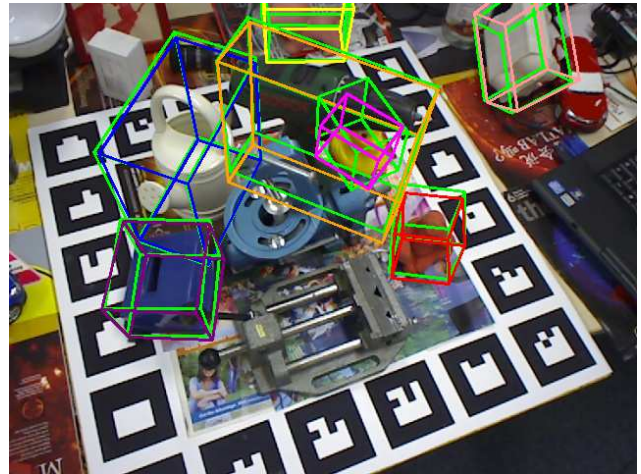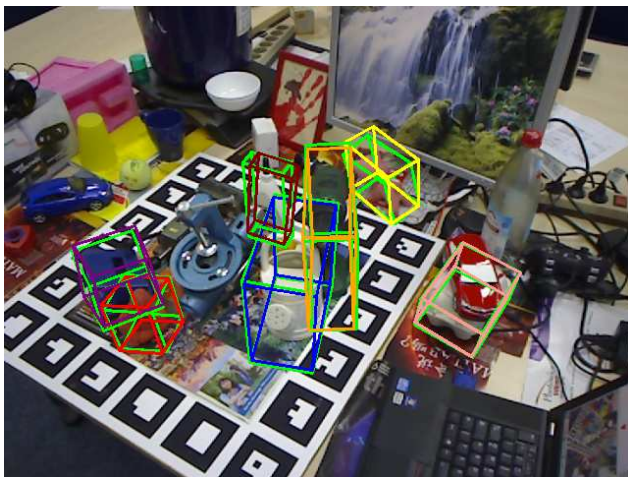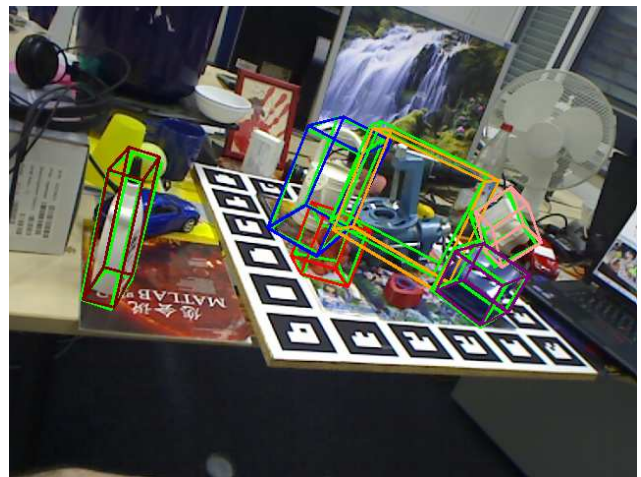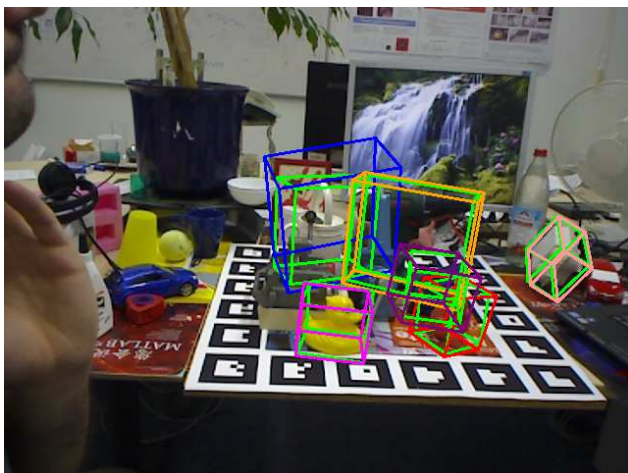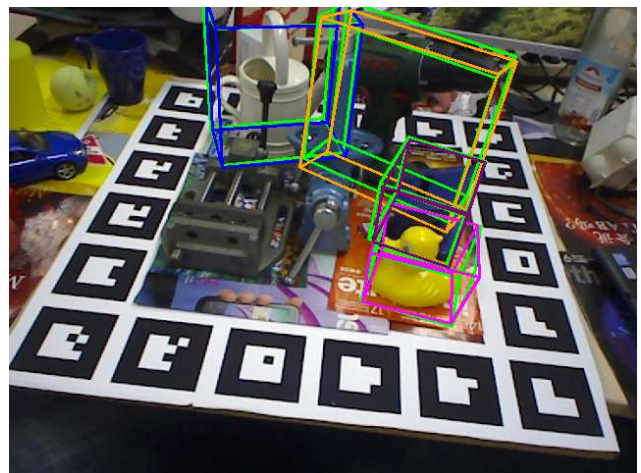

Figure 8: **Example results on the OCCLUSION dataset.** Green bounding boxes correspond to ground truth poses, bounding boxes of other colors correspond to predicted poses.

## References

- [1] Kaiming He, Xiangyu Zhang, Shaoqing Ren, and Jian Sun. Deep residual learning for image recognition. In *Proceedings of the IEEE conference on computer vision and pattern recognition*, pages 770–778, 2016.
- [2] Wadim Kehl, Fabian Manhardt, Federico Tombari, Slobodan Ilic, and Nassir Navab. Ssd-6d: Making rgb-based 3d detection and 6d pose estimation great again. In *Proceedings of the IEEE International Conference on Computer Vision*, pages 1521–1529, 2017.
- [3] Yi Li, Gu Wang, Xiangyang Ji, Yu Xiang, and Dieter Fox. Deepim: Deep iterative matching for 6d pose estimation. In *Proceedings of the European Conference on Computer Vision (ECCV)*, pages 683–698, 2018.
- [4] Sida Peng, Yuan Liu, Qixing Huang, Xiaowei Zhou, and Hujun Bao. Pvnnet: Pixel-wise voting network for 6dof pose estimation. In *Proceedings of the IEEE Conference on Computer Vision and Pattern Recognition*, pages 4561–4570, 2019.
- [5] Martin Sundermeyer, Zoltan-Csaba Marton, Maximilian Durner, Manuel Brucker, and Rudolph Triebel. Implicit 3d orientation learning for 6d object detection from rgb images. In *Proceedings of the European Conference on Computer Vision (ECCV)*, pages 699–715, 2018.
- [6] Bugra Tekin, Sudipta N Sinha, and Pascal Fua. Real-time seamless single shot 6d object pose prediction. In *Proceedings of the IEEE Conference on Computer Vision and Pattern Recognition*, pages 292–301, 2018.
- [7] Yu Xiang, Tanner Schmidt, Venkatraman Narayanan, and Dieter Fox. Posecnn: A convolutional neural network for 6d object pose estimation in cluttered scenes. *arXiv preprint arXiv:1711.00199*, 2017.
